# Supplementary material
Source: PubMed Central journal article supplement (PMC7965281)
Supplement: 14-00986.pdf [file 14-00986.pdf]

## ON-LINE APPENDIX

### Graph Theoretical Measures

**Network Strength.** The connectivity strength ( $S_i$ ) of node  $i$  is defined as the sum of weights of the edges that are directly connected to node  $i$ :

$$S_i = \sum_{j \in G} w_{ij}$$

where  $w_{ij}$  is the edge weight between node  $i$  and  $j$ . The network strength  $S_p$  is defined as the average of the strengths over all nodes in the graph:

$$S_p = \frac{1}{N} \sum_{i \in G} S_i$$

**Clustering Coefficient.** This measure reflects functional segregation of brain networks, which is a measure of the propensity of the brain to execute specialized processes within interconnected groups of brain regions or clusters.<sup>20</sup> The clustering coefficient of a node  $i$ ,  $C_i$ , defined as the fraction of node  $i$  neighbors that are connected to each other,<sup>21</sup> is calculated as follows:

$$C_i = \frac{2}{k_i(k_i - 1)} \sum_{j, k \in G, j, k \neq i} (w_{ij}w_{jk}w_{ki})^{1/3}$$

where,  $k_i$  is the number of edges linking to node  $i$  (ie, the degree of node  $i$ ) and  $w$  is the weight. If node  $i$  is either isolated or has only 1 connection (ie,  $k_i = 0$  or 1) then  $C_i = 0$ .

The average clustering coefficient of a graph,  $C_p$ , reflects the extent of local interconnectivity in a network, with a high clustering coefficient indicating that the neighbors of a node are directly connected to each other<sup>21</sup>:

$$C_p = \frac{1}{N} \sum_{i \in G} C_i$$

**Characteristic Path Length.** A path between 2 nodes,  $i$  and  $j$ , is a sequence of distinct nodes and links between them that connect the 2 nodes. In a weighted graph, edge length is computed as the reciprocal of edge weight (ie,  $1/w_{ij}$ ) and path length between a pair of nodes is defined as the sum of edge lengths along the path. The shortest path length,  $L_{ij}$ , is defined as the length of the path with minimum sum of edge lengths among all the paths between the 2 nodes  $i$  and  $j$ . The characteristic path length of a weighted graph,  $L_p$ , is defined as the mean of the shortest path length between all pairs of nodes:

$$L_p = \frac{1}{N(N-1)} \sum_{i \neq j \in G} L_{ij}$$

$L_p$  is the most commonly used measure of functional integration and quantifies the ability of the network to propagate information in parallel.<sup>20</sup>

**Global Efficiency.** Global efficiency is the inverse of the characteristic path length of a weighted network and is another measure of functional integration. It reflects how efficiently information can be exchanged over the whole network, with larger global efficiency indicating a more efficient network:

$$E_{\text{glob}} = \frac{1}{N(N-1)} \sum_{i \neq j \in G} \frac{1}{L_{ij}}$$

**Small-World Parameters.** Small-world networks are defined as networks that have a characteristic path length similar to those of random networks but are significantly more clustered than random networks.<sup>21</sup> The degree of “small-worldness” of a network can be assessed by using a normalized clustering coefficient  $\gamma$  and normalized characteristic path length  $\lambda$ , which measures the clustering coefficient and the characteristic path length of real networks relative to random networks. To calculate these 2 parameters, we first binarized the connectivity matrices by setting all connections where at least 1 tract was reconstructed to 1 and all others to zero. We then generated 100 random networks while preserving the number of nodes and edges of each binary connectivity matrix. The clustering coefficient ( $C_p^{\text{real}}$ ) and characteristic path length ( $L_p^{\text{real}}$ ) of each subject were then compared with the mean clustering coefficient ( $C_p^{\text{rand}}$ ) and mean characteristic path length ( $L_p^{\text{rand}}$ ) of the 100 random networks as follows:

$$\gamma = \frac{C_p^{\text{real}}}{C_p^{\text{rand}}}, \lambda = \frac{L_p^{\text{real}}}{L_p^{\text{rand}}}$$

The small-worldness of a network can be summarized into a scalar quantitative measurement, which is the ratio of  $\gamma/\lambda$ .  $\sigma > 1$  indicates that the network has small-world property.

**Nodal Efficiency.** Nodal efficiency is the reciprocal of the harmonic mean of the shortest path length between node  $i$  and all other nodes in the network.<sup>22</sup> The nodal efficiency quantifies the importance of the nodes for communication within the network. The nodes with high nodal efficiencies can be categorized as hubs in a network.<sup>22</sup>

$$E_{\text{nodal}}(i) = \frac{1}{(N-1)} \sum_{j \in G, j \neq i} \frac{1}{L_{ij}}$$

**On-line Table 1: Brain regions with significant nodal efficiency of all patients with epilepsy, frontal lobe epilepsy, and temporal lobe epilepsy relative to controls**

|                                         | Enodal Controls | Enodal All Epilepsy                     | Enodal FLE                              | Enodal TLE                              |
|-----------------------------------------|-----------------|-----------------------------------------|-----------------------------------------|-----------------------------------------|
| L precentral gyrus                      | 0.0362          |                                         | 0.0352 ( <i>P</i> = .0177)              |                                         |
| L dorsolateral superior frontal gyrus   | 0.0391          |                                         | 0.0379 ( <i>P</i> = .0074)              |                                         |
| L orbital superior frontal gyrus        | 0.0442          | 0.0428 ( <i>P</i> = .0344)              | 0.0425 ( <i>P</i> = .0266)              |                                         |
| L middle frontal gyrus                  | 0.0376          |                                         | 0.0364 ( <i>P</i> = .0085)              |                                         |
| L orbital middle frontal gyrus          | 0.0403          |                                         | 0.0391 ( <i>P</i> = .0335)              |                                         |
| R orbital middle frontal gyrus          | 0.0373          | 0.036 ( <i>P</i> = .0213)               | 0.0357 ( <i>P</i> = .0161)              |                                         |
| L triangular inferior frontal gyrus     | 0.0367          | 0.0357 ( <i>P</i> = .0225)              | 0.0354 ( <i>P</i> = .0067)              |                                         |
| L orbital inferior frontal gyrus        | 0.0409          | 0.0392 ( <i>P</i> = .0033)              | 0.039 ( <i>P</i> = .0021)               |                                         |
| R orbital inferior frontal gyrus        | 0.0369          |                                         | 0.0355 ( <i>P</i> = .0402)              |                                         |
| L rolandic operculum                    | 0.039           |                                         | 0.0378 ( <i>P</i> = .0448)              |                                         |
| R rolandic operculum                    | 0.0383          | 0.0372 ( <i>P</i> = .0268)              | 0.0365 ( <i>P</i> = .003)               |                                         |
| L olfactory cortex                      | 0.0453          | 0.0431 ( <i>P</i> = .0085)              | 0.0429 ( <i>P</i> = .0161)              | 0.0431 ( <i>P</i> = .0164)              |
| R olfactory cortex                      | 0.0459          | 0.044 ( <i>P</i> = .0111)               | 0.0439 ( <i>P</i> = .0295)              | 0.0439 ( <i>P</i> = .0164)              |
| L medial superior frontal gyrus         | 0.0391          | 0.038 ( <i>P</i> = .0047)               | 0.0376 ( <i>P</i> = .0027)              |                                         |
| R medial superior frontal gyrus         | 0.0379          | 0.0367 ( <i>P</i> = .0044)              | 0.0366 ( <i>P</i> = .0045)              | 0.0368 ( <i>P</i> = .0377)              |
| L medial orbital superior frontal gyrus | 0.0401          |                                         | 0.0389 ( <i>P</i> = .0487)              |                                         |
| R medial orbital superior frontal gyrus | 0.0405          | 0.0393 ( <i>P</i> = .0279)              | 0.0392 ( <i>P</i> = .0455)              |                                         |
| L gyrus rectus                          | 0.0486          | 0.0469 ( <i>P</i> = .0269)              | 0.0468 ( <i>P</i> = .0446)              |                                         |
| L insula                                | 0.0415          | 0.0402 ( <i>P</i> = .0313)              | 0.0401 ( <i>P</i> = .0422)              |                                         |
| R insula                                | 0.0389          |                                         | 0.0373 ( <i>P</i> = .0266)              |                                         |
| L anterior cingulate                    | 0.0444          | 0.043 ( <i>P</i> = .007)                | 0.0428 ( <i>P</i> = .0115)              | 0.0429 ( <i>P</i> = .0095)              |
| R anterior cingulate                    | 0.044           | 0.0424 ( <i>P</i> = .0003) <sup>a</sup> | 0.0424 ( <i>P</i> = .0015)              | 0.0423 ( <i>P</i> = .0021)              |
| L hippocampus                           | 0.028           | 0.021 ( <i>P</i> = .0001) <sup>a</sup>  | 0.0207 ( <i>P</i> = .0013)              | 0.0212 ( <i>P</i> = .0119)              |
| R hippocampus                           | 0.0311          | 0.0252 ( <i>P</i> = .0001) <sup>a</sup> | 0.025 ( <i>P</i> = .0022)               | 0.0257 ( <i>P</i> = .0199)              |
| L parahippocampal gyrus                 | 0.0465          | 0.0424 ( <i>P</i> < .0001) <sup>a</sup> | 0.0418 ( <i>P</i> = .0001) <sup>a</sup> | 0.0435 ( <i>P</i> = .0205)              |
| R parahippocampal gyrus                 | 0.0477          | 0.0438 ( <i>P</i> < .0001) <sup>a</sup> | 0.0435 ( <i>P</i> = .0001) <sup>a</sup> | 0.044 ( <i>P</i> = .0038)               |
| L amygdala                              | 0.0375          | 0.0278 ( <i>P</i> < .0001) <sup>a</sup> | 0.0282 ( <i>P</i> < .0001) <sup>a</sup> | 0.0276 ( <i>P</i> = .0001) <sup>a</sup> |
| R amygdala                              | 0.0412          | 0.0338 ( <i>P</i> < .0001) <sup>a</sup> | 0.0338 ( <i>P</i> < .0001) <sup>a</sup> | 0.0331 ( <i>P</i> = .0001) <sup>a</sup> |
| L pericalcarine fissure cortex          | 0.0543          | 0.0526 ( <i>P</i> = .019)               | 0.0518 ( <i>P</i> = .0027)              |                                         |
| R pericalcarine fissure cortex          | 0.0554          | 0.054 ( <i>P</i> = .0393)               | 0.0535 ( <i>P</i> = .0142)              |                                         |
| L cuneus                                | 0.051           |                                         | 0.0492 ( <i>P</i> = .0274)              |                                         |
| L lingual gyrus                         | 0.053           | 0.0513 ( <i>P</i> = .0174)              | 0.0505 ( <i>P</i> = .0012)              |                                         |
| R lingual gyrus                         | 0.0534          | 0.0517 ( <i>P</i> = .0095)              | 0.0511 ( <i>P</i> = .0014)              |                                         |
| L superior occipital gyrus              | 0.0472          |                                         | 0.0456 ( <i>P</i> = .0208)              |                                         |
| L middle occipital gyrus                | 0.0458          |                                         | 0.0442 ( <i>P</i> = .009)               |                                         |
| R middle occipital gyrus                | 0.0432          |                                         |                                         | 0.0447 ( <i>P</i> = .0159)              |
| L inferior occipital gyrus              | 0.0437          |                                         | 0.0418 ( <i>P</i> = .0016)              |                                         |
| R inferior occipital gyrus              | 0.0388          |                                         | 0.0375 ( <i>P</i> = .0103)              |                                         |
| L fusiform gyrus                        | 0.0524          | 0.0502 ( <i>P</i> = .0094)              | 0.0495 ( <i>P</i> = .0009) <sup>a</sup> |                                         |
| R fusiform gyrus                        | 0.0525          | 0.0502 ( <i>P</i> = .0016)              | 0.0497 ( <i>P</i> = .0004) <sup>a</sup> |                                         |
| L Heschl gyrus                          | 0.0455          |                                         | 0.0437 ( <i>P</i> = .0121)              |                                         |
| R Heschl gyrus                          | 0.0451          |                                         | 0.0435 ( <i>P</i> = .0206)              |                                         |
| L superior temporal gyrus               | 0.0464          |                                         | 0.0449 ( <i>P</i> = .0225)              |                                         |
| R superior temporal gyrus               | 0.0454          |                                         | 0.0438 ( <i>P</i> = .0068)              |                                         |
| L temporal pole superior temporal gyrus | 0.0392          | 0.0365 ( <i>P</i> = .0006) <sup>a</sup> | 0.0358 ( <i>P</i> = .0004) <sup>a</sup> |                                         |
| R temporal pole superior temporal gyrus | 0.0382          | 0.0345 ( <i>P</i> < .0001) <sup>a</sup> | 0.0344 ( <i>P</i> = .0001) <sup>a</sup> | 0.0344 ( <i>P</i> = .0009) <sup>a</sup> |
| L middle temporal gyrus                 | 0.0441          |                                         | 0.0427 ( <i>P</i> = .0178)              |                                         |
| R middle temporal gyrus                 | 0.0423          | 0.0414 ( <i>P</i> = .0277)              | 0.0406 ( <i>P</i> = .0009) <sup>a</sup> |                                         |
| L temporal pole middle temporal gyrus   | 0.0358          | 0.0341 ( <i>P</i> = .0226)              | 0.0334 ( <i>P</i> = .0043)              |                                         |
| R temporal pole middle temporal gyrus   | 0.0321          | 0.0303 ( <i>P</i> = .0035)              | 0.0302 ( <i>P</i> = .0088)              | 0.0305 ( <i>P</i> = .017)               |
| L inferior temporal gyrus               | 0.0447          | 0.0432 ( <i>P</i> = .014)               | 0.0426 ( <i>P</i> = .002)               |                                         |
| R inferior temporal gyrus               | 0.043           | 0.0417 ( <i>P</i> = .0145)              | 0.0413 ( <i>P</i> = .0035)              |                                         |

**Note:**—L indicates left; R, right; Enodal, significant nodal efficiency.

<sup>a</sup>*P* ≤ .001.

**On-line Table 2: Network-based statistics demonstrating reduced subnetwork connections in patients with epilepsy, frontal lobe epilepsy, and temporal lobe epilepsy relative to controls**

| Subnetwork                               | Patients with Epilepsy                                                                                                                                                                                                                                                                                                                                                                                                                                                                                                                                                      | Patients with FLE                                                                                                                                                                                                                                                                                        | Patients with TLE                                                                                                                                                                                                                                                                              |
|------------------------------------------|-----------------------------------------------------------------------------------------------------------------------------------------------------------------------------------------------------------------------------------------------------------------------------------------------------------------------------------------------------------------------------------------------------------------------------------------------------------------------------------------------------------------------------------------------------------------------------|----------------------------------------------------------------------------------------------------------------------------------------------------------------------------------------------------------------------------------------------------------------------------------------------------------|------------------------------------------------------------------------------------------------------------------------------------------------------------------------------------------------------------------------------------------------------------------------------------------------|
| Frontal-temporal                         | Right inferior frontal gyrus to left inferior temporal gyrus<br>Left olfactory cortex to left middle temporal gyrus                                                                                                                                                                                                                                                                                                                                                                                                                                                         | Left olfactory cortex to left hippocampus<br>Right orbital superior frontal gyrus to left parahippocampal gyrus                                                                                                                                                                                          | Left olfactory cortex to left amygdala<br>Right olfactory cortex to right amygdala                                                                                                                                                                                                             |
| Insula-temporal                          | Left insula to left superior temporal gyrus                                                                                                                                                                                                                                                                                                                                                                                                                                                                                                                                 | Left insula to left amygdala                                                                                                                                                                                                                                                                             | Right fusiform gyrus to left paracentral lobule<br>Left insula to left superior temporal gyrus<br>Right insula to right superior temporal gyrus<br>Left insula to left amygdala                                                                                                                |
| Temporal-temporal                        | Left hippocampus to right fusiform gyrus<br>Left parahippocampal gyrus to right fusiform gyrus<br>Right hippocampus to left superior temporal gyrus<br>Right hippocampus to right middle temporal gyrus<br>Right parahippocampal gyrus to right superior temporal gyrus<br>Right parahippocampal gyrus to left inferior temporal gyrus                                                                                                                                                                                                                                      | Left hippocampus to right hippocampus<br>Left hippocampus to left parahippocampal gyrus<br>Left hippocampus to left amygdala<br>Right hippocampus to left amygdala<br>Left hippocampus to right amygdala<br>Right hippocampus to right amygdala                                                          | Left hippocampus to left amygdala<br>Left parahippocampal gyrus to left amygdala<br>Right parahippocampal gyrus to right amygdala<br>Left amygdala to left superior temporal gyrus<br>Left hippocampus to right fusiform gyrus<br>Right parahippocampal gyrus to right superior temporal gyrus |
| Frontal-occipital                        | Left amygdala to left superior temporal gyrus<br>Right amygdala to right superior temporal gyrus<br>Left superior temporal gyrus to left middle temporal gyrus<br>Left fusiform gyrus to right superior temporal gyrus<br>Left middle temporal gyrus to left inferior temporal gyrus                                                                                                                                                                                                                                                                                        | Left amygdala to left superior temporal gyrus<br>Right amygdala to right superior temporal gyrus<br>Left parahippocampal gyrus to left amygdala<br>Right parahippocampal gyrus to left amygdala<br>Right parahippocampal gyrus to right amygdala<br>Left fusiform gyrus to right superior temporal gyrus |                                                                                                                                                                                                                                                                                                |
| Temporal-occipital                       | Left precentral gyrus to left precuneus<br>Left inferior frontal gyrus to left precuneus<br>Left insula to left precuneus<br>Right superior frontal gyrus to right precuneus<br>Right middle frontal gyrus to right precuneus<br>Left lingual gyrus to right fusiform gyrus<br>Left amygdala to left precuneus<br>Right superior occipital gyrus to left superior temporal gyrus<br>Left inferior occipital gyrus to left superior temporal gyrus<br>Right calcarine cortex to right middle temporal gyrus<br>Left inferior occipital gyrus to left inferior temporal gyrus | Left hippocampus to left lingual gyrus<br>Right parahippocampal gyrus to left lingual gyrus<br>Left hippocampus to left inferior occipital gyrus<br>Left inferior occipital gyrus to left superior temporal gyrus                                                                                        | Left hippocampus to left lingual gyrus<br>Right parahippocampal gyrus to left lingual gyrus                                                                                                                                                                                                    |
| Occipital-occipital<br>Frontal-occipital |                                                                                                                                                                                                                                                                                                                                                                                                                                                                                                                                                                             | Left middle occipital gyrus to left inferior occipital gyrus                                                                                                                                                                                                                                             | Left olfactory cortex to right lingual gyrus                                                                                                                                                                                                                                                   |
